# Supplementary material for: Metabolomic signatures associated with fetal growth restriction and small for gestational age: a systematic review
Source: Springer Nature journal article supplement (doi:10.1038/s41467-024-53597-4), 2024-11-11
Supplement: MOESM1 [file 41467_2024_53597_MOESM1_ESM.pdf]

## SUPPLEMENTARY INFORMATION

### **Metabolomic signatures associated with fetal growth restriction and small for gestational age: a systematic review**

Agustin Conde-Agudelo<sup>1\*</sup>, Jose Villar<sup>1,2\*</sup>, Milagros Risso<sup>3</sup>, Aris T. Papageorgiou<sup>1,2</sup>, Lee D. Roberts<sup>4</sup> & Stephen H. Kennedy<sup>1,2</sup>

1. Oxford Maternal & Perinatal Health Institute, Green Templeton College, University of Oxford, Oxford, UK
2. Nuffield Department of Women's & Reproductive Health, University of Oxford, Oxford, UK
3. Hospital Universitario General de Villalba, Madrid, Spain
4. Leeds Institute of Cardiovascular and Metabolic Medicine, University of Leeds, Leeds, UK

Corresponding authors: Agustin Conde-Agudelo [condeagu@hotmail.com](mailto:condeagu@hotmail.com) and Jose Villar [jose.villar@wrh.ox.ac.uk](mailto:jose.villar@wrh.ox.ac.uk)

#### **Table of Contents**

**Supplementary Table 1.** Results from the pathway analysis in umbilical cord blood samples.

**Supplementary Table 2.** Results from the pathway analysis in newborn dried blood spot samples.

**Supplementary Table 3.** Results from the pathway analysis in maternal plasma/serum at >20 weeks' gestation or in the peripartum period.

**Supplementary Table 4.** Results from the pathway analysis in placental samples.

**Supplementary Figure 1.** Risk of bias for each included study.

**Supplementary Figure 2.** Pathway analysis for significantly and consistently up- and down-regulated metabolites (N=5) that were reported in more than one study in maternal plasma/serum at >20 weeks' gestation or in the peripartum period.

**Supplementary Figure 3.** Pathway analysis for significantly and consistently up- and down-regulated metabolites (N=3) that were reported in more than one study in placental samples.

**Supplementary Box 1.** Metabolites significantly up-regulated or down-regulated in more than one study with a consistent direction of the association

**Supplementary Table 1 | Results from the pathway analysis in umbilical cord blood samples.**

| <b>Pathway name</b>                             | <b>Match status</b> | <b>Raw p</b> | <b>Holm adjusted p</b> | <b>FDR p</b> | <b>Impact</b> |
|-------------------------------------------------|---------------------|--------------|------------------------|--------------|---------------|
| Biosynthesis of unsaturated fatty acids         | 4/36                | 1.959E-4     | 0.015672               | 0.015672     | 0.0           |
| Glycerophospholipid metabolism                  | 3/36                | 0.00336      | 0.26544                | 0.1344       | 0.13764       |
| Neomycin, kanamycin and gentamicin biosynthesis | 1/2                 | 0.017704     | 1.0                    | 0.47212      | 0.0           |
| Linoleic acid metabolism                        | 1/5                 | 0.043716     | 1.0                    | 0.87432      | 0.0           |
| Arachidonic acid metabolism                     | 2/44                | 0.056108     | 1.0                    | 0.89773      | 0.27659       |
| Valine, leucine and isoleucine biosynthesis     | 1/8                 | 0.069087     | 1.0                    | 0.92115      | 0.0           |
| alpha-Linolenic acid metabolism                 | 1/13                | 0.10999      | 1.0                    | 1.0          | 0.0           |
| Starch and sucrose metabolism                   | 1/18                | 0.14921      | 1.0                    | 1.0          | 0.4207        |
| Ether lipid metabolism                          | 1/20                | 0.16445      | 1.0                    | 1.0          | 0.08176       |
| Galactose metabolism                            | 1/27                | 0.2158       | 1.0                    | 1.0          | 0.03499       |
| Lysine degradation                              | 1/30                | 0.2369       | 1.0                    | 1.0          | 0.11247       |
| Glycine, serine and threonine metabolism        | 1/33                | 0.25747      | 1.0                    | 1.0          | 0.0           |
| Arginine and proline metabolism                 | 1/36                | 0.27753      | 1.0                    | 1.0          | 0.02093       |
| Valine, leucine and isoleucine degradation      | 1/40                | 0.30348      | 1.0                    | 1.0          | 0.0           |
| Steroid biosynthesis                            | 1/41                | 0.30984      | 1.0                    | 1.0          | 0.02837       |

|                                |      |         |     |     |         |
|--------------------------------|------|---------|-----|-----|---------|
| Primary bile acid biosynthesis | 1/46 | 0.3408  | 1.0 | 1.0 | 0.05065 |
| Fatty acid biosynthesis        | 1/47 | 0.34684 | 1.0 | 1.0 | 0.0     |
| Steroid hormone biosynthesis   | 1/87 | 0.55018 | 1.0 | 1.0 | 0.00523 |

The table shows the detailed results from the pathway analysis. Since many pathways are tested at the same time, the statistical p values from enrichment analysis are further adjusted for multiple testings. Match status reflects hits/total, where total means the total number of compounds in the pathway, and the hits are the actually matched compounds from the list; the Raw p is the original p value calculated from the enrichment analysis; the Holm p is the adjusted p value calculated from the Holm-Bonferroni method; the FDR p is the p value adjusted using False Discovery Rate; the Impact is the pathway impact value calculated from pathway topology analysis. *FDR* false discovery rate.

**Supplementary Table 2 | Results from the pathway analysis in newborn dried blood spot samples.**

| Pathway name                                        | Match status | Raw p     | Holm adjusted p | FDR p    | Impact  |
|-----------------------------------------------------|--------------|-----------|-----------------|----------|---------|
| Phenylalanine, tyrosine and tryptophan biosynthesis | 2/4          | 1.7323E-4 | 0.013858        | 0.013858 | 1.0     |
| Valine, leucine and isoleucine biosynthesis         | 2/8          | 7.9884E-4 | 0.063109        | 0.021302 | 0.0     |
| Phenylalanine metabolism                            | 2/8          | 7.9884E-4 | 0.063109        | 0.021302 | 0.35714 |
| Arginine and proline metabolism                     | 2/36         | 0.016537  | 1.0             | 0.3237   | 0.14186 |
| Valine, leucine and isoleucine degradation          | 2/40         | 0.020231  | 1.0             | 0.3237   | 0.0     |
| Arginine biosynthesis                               | 1/14         | 0.077404  | 1.0             | 0.99384  | 0.07614 |
| Ubiquinone and other terpenoid-quinone biosynthesis | 1/18         | 0.098517  | 1.0             | 0.99384  | 0.0     |
| Pantothenate and CoA biosynthesis                   | 1/20         | 0.10891   | 1.0             | 0.99384  | 0.0     |
| Lipoic acid metabolism                              | 1/28         | 0.14944   | 1.0             | 0.99384  | 0.0017  |
| Glutathione metabolism                              | 1/28         | 0.14944   | 1.0             | 0.99384  | 0.08873 |
| Lysine degradation                                  | 1/30         | 0.15931   | 1.0             | 0.99384  | 0.0     |
| Porphyrin metabolism                                | 1/31         | 0.1642    | 1.0             | 0.99384  | 0.0     |
| Glyoxylate and dicarboxylate metabolism             | 1/32         | 0.16908   | 1.0             | 0.99384  | 0.10582 |
| Glycine, serine and threonine metabolism            | 1/33         | 0.17392   | 1.0             | 0.99384  | 0.25981 |
| Fatty acid degradation                              | 1/39         | 0.20248   | 1.0             | 1.0      | 0.0     |

---

|                     |      |         |     |     |         |
|---------------------|------|---------|-----|-----|---------|
| Tyrosine metabolism | 1/42 | 0.21642 | 1.0 | 1.0 | 0.13972 |
|---------------------|------|---------|-----|-----|---------|

---

The table shows the detailed results from the pathway analysis. Since many pathways are tested at the same time, the statistical p values from enrichment analysis are further adjusted for multiple testings. Match status reflects hits/total, where total means the total number of compounds in the pathway, and the hits are the actually matched compounds from the list; the Raw p is the original p value calculated from the enrichment analysis; the Holm p is the adjusted p value calculated from the Holm-Bonferroni method; the FDR p is the p value adjusted using False Discovery Rate; the Impact is the pathway impact value calculated from pathway topology analysis. *FDR* false discovery rate.

**Supplementary Table 3 | Results from the pathway analysis in maternal plasma/serum at >20 weeks' gestation or in the peripartum period.**

| Pathway name                                | Match status | Raw p    | Holm adjusted p | FDR     | Impact  |
|---------------------------------------------|--------------|----------|-----------------|---------|---------|
| Glyoxylate and dicarboxylate metabolism     | 2/32         | 0.003851 | 0.30808         | 0.30808 | 0.04233 |
| Valine, leucine and isoleucine biosynthesis | 1/8          | 0.025172 | 1.0             | 0.67057 | 0.0     |
| Biotin metabolism                           | 1/10         | 0.031385 | 1.0             | 0.67057 | 0.0     |
| D-Amino acid metabolism                     | 1/15         | 0.046779 | 1.0             | 0.67057 | 0.0     |
| Butanoate metabolism                        | 1/15         | 0.046779 | 1.0             | 0.67057 | 0.03175 |
| Citrate cycle (TCA cycle)                   | 1/20         | 0.061977 | 1.0             | 0.67057 | 0.04412 |
| Pyruvate metabolism                         | 1/23         | 0.071002 | 1.0             | 0.67057 | 0.0283  |
| Alanine, aspartate and glutamate metabolism | 1/28         | 0.085889 | 1.0             | 0.67057 | 0.08654 |
| Lysine degradation                          | 1/30         | 0.091791 | 1.0             | 0.67057 | 0.0     |
| Sphingolipid metabolism                     | 1/32         | 0.097661 | 1.0             | 0.67057 | 0.0     |
| Cysteine and methionine metabolism          | 1/33         | 0.10059  | 1.0             | 0.67057 | 0.02184 |
| Glycine, serine and threonine metabolism    | 1/33         | 0.10059  | 1.0             | 0.67057 | 0.21459 |
| Arginine and proline metabolism             | 1/36         | 0.10931  | 1.0             | 0.67269 | 0.04767 |
| Valine, leucine and isoleucine degradation  | 1/40         | 0.12084  | 1.0             | 0.69052 | 0.0     |

The table shows the detailed results from the pathway analysis. Since many pathways are tested at the same time, the statistical p values from enrichment analysis are further adjusted for multiple testings. Match status reflects hits/total, where total means the total number of compounds in the pathway, and the hits are the actually matched compounds from the list; the Raw p is the original p

value calculated from the enrichment analysis; the Holm p is the adjusted p value calculated from the Holm-Bonferroni method; the FDR p is the p value adjusted using False Discovery Rate; the Impact is the pathway impact value calculated from pathway topology analysis. *FDR* false discovery rate.

**Supplementary Table 4 | Results from the pathway analysis in placental samples.**

| <b>Pathway name</b>                      | <b>Match status</b> | <b>Raw p</b> | <b>Holm adjusted p</b> | <b>FDR</b> | <b>Impact</b> |
|------------------------------------------|---------------------|--------------|------------------------|------------|---------------|
| Ether lipid metabolism                   | 1/20                | 0.037637     | 1.0                    | 0.59607    | 0.0           |
| Pyruvate metabolism                      | 1/23                | 0.0432       | 1.0                    | 0.59607    | 0.0           |
| Glycolysis / Gluconeogenesis             | 1/26                | 0.048741     | 1.0                    | 0.59607    | 0.0           |
| Lipoic acid metabolism                   | 1/28                | 0.052424     | 1.0                    | 0.59607    | 0.0017        |
| Glutathione metabolism                   | 1/28                | 0.052424     | 1.0                    | 0.59607    | 0.08873       |
| Porphyrin metabolism                     | 1/31                | 0.057929     | 1.0                    | 0.59607    | 0.0           |
| Glyoxylate and dicarboxylate metabolism  | 1/32                | 0.05976      | 1.0                    | 0.59607    | 0.10582       |
| Glycine, serine and threonine metabolism | 1/33                | 0.061588     | 1.0                    | 0.59607    | 0.25981       |
| Glycerophospholipid metabolism           | 1/36                | 0.067058     | 1.0                    | 0.59607    | 0.04814       |
| Primary bile acid biosynthesis           | 1/46                | 0.085137     | 1.0                    | 0.6811     | 0.00758       |

The table shows the detailed results from the pathway analysis. Since many pathways are tested at the same time, the statistical p values from enrichment analysis are further adjusted for multiple testings. Match status reflects hits/total, where total means the total number of compounds in the pathway, and the hits are the actually matched compounds from the list; the Raw p is the original p value calculated from the enrichment analysis; the Holm p is the adjusted p value calculated from the Holm-Bonferroni method; the FDR p is the p value adjusted using False Discovery Rate; the Impact is the pathway impact value calculated from pathway topology analysis. *FDR* false discovery rate.



**Supplementary Figure 1 | Risk of bias for each included study.** The risk of bias in each included study was assessed using a modified version of QUADOMICS, an adaptation of the Quality Assessment of Diagnostic Accuracy Studies (QUADAS) tool for studies using omic technologies. A total of eight domains were assessed. Each domain was judged as having a “low”, “high”, or “unclear” risk of bias. Source data are provided as a Source Data file.

| Study             | Selection of participants | Description of selection criteria | Description of procedures and timing of biological sample collection | Reporting of handling of specimens and pre-analytical procedures | Description of metabolite extraction methods and analytical techniques | Blinded interpretation of metabolomics results | Control for potential confounding variables | Avoiding of overfitting |
|-------------------|---------------------------|-----------------------------------|----------------------------------------------------------------------|------------------------------------------------------------------|------------------------------------------------------------------------|------------------------------------------------|---------------------------------------------|-------------------------|
| Horgan 2010       | ?                         | −                                 | +                                                                    | +                                                                | +                                                                      | ?                                              | +                                           | −                       |
| Dessi 2011        | ?                         | −                                 | ?                                                                    | +                                                                | +                                                                      | ?                                              | +                                           | −                       |
| Horgan 2011       | +                         | ?                                 | +                                                                    | +                                                                | +                                                                      | +                                              | +                                           | ?                       |
| Favretto 2012     | +                         | +                                 | ?                                                                    | ?                                                                | +                                                                      | ?                                              | +                                           | −                       |
| Ivorra 2012       | +                         | −                                 | ?                                                                    | +                                                                | +                                                                      | ?                                              | +                                           | +                       |
| Bobiński 2013     | +                         | ?                                 | ?                                                                    | +                                                                | +                                                                      | ?                                              | −                                           | −                       |
| Ryckman 2013      | ?                         | +                                 | +                                                                    | ?                                                                | +                                                                      | ?                                              | +                                           | +                       |
| Sanz-Cortés 2013  | +                         | +                                 | +                                                                    | +                                                                | +                                                                      | ?                                              | +                                           | ?                       |
| Dessi 2014        | ?                         | −                                 | ?                                                                    | +                                                                | +                                                                      | ?                                              | −                                           | ?                       |
| Maitre 2014       | +                         | ?                                 | ?                                                                    | ?                                                                | +                                                                      | ?                                              | +                                           | ?                       |
| Sulek 2014        | +                         | ?                                 | +                                                                    | +                                                                | +                                                                      | ?                                              | ?                                           | −                       |
| Liu 2016          | +                         | +                                 | ?                                                                    | ?                                                                | −                                                                      | ?                                              | −                                           | −                       |
| Abd El-Wahed 2017 | +                         | +                                 | −                                                                    | −                                                                | −                                                                      | ?                                              | ?                                           | −                       |

|                   |   |   |   |   |   |   |   |   |
|-------------------|---|---|---|---|---|---|---|---|
| Visentin 2017     | + | + | + | ? | + | ? | - | - |
| Delplancke 2018   | + | ? | + | + | + | ? | ? | - |
| Lu 2018           | + | ? | ? | ? | + | ? | + | - |
| Miranda 2018      | + | + | + | + | + | ? | + | ? |
| Bahado-Singh 2019 | + | ? | + | + | + | ? | + | ? |
| Alfano 2020       | + | + | + | + | + | ? | + | ? |
| Briana 2020       | + | + | ? | + | + | ? | + | ? |
| Clinton 2020      | + | + | ? | + | + | ? | ? | + |
| Kan 2020          | + | - | + | + | ? | ? | - | - |
| Sovio 2020        | + | + | + | + | + | ? | + | + |
| Welch 2020        | + | + | ? | - | + | ? | + | + |
| Beken 2021        | + | + | + | ? | + | ? | - | - |
| Byeon 2021        | + | ? | ? | + | + | ? | ? | - |
| Morillon 2021     | + | ? | + | + | + | ? | + | + |
| Moros 2021        | + | ? | + | + | ? | ? | + | - |
| Schupper 2021     | + | + | + | + | + | + | + | - |
| Youssef 2021      | + | + | ? | ? | + | ? | + | ? |
| Bahado-Singh 2022 | + | + | + | ? | + | ? | + | - |

|                       |   |   |   |   |   |   |   |   |
|-----------------------|---|---|---|---|---|---|---|---|
| Chao de la Barca 2022 | + | + | + | + | + | ? | + | + |
| Gonzalez-Riano 2022   | + | + | - | ? | + | ? | + | - |
| Karaer 2022           | + | + | + | + | + | ? | + | - |
| Liu 2022              | + | + | ? | ? | ? | ? | + | - |
| McCarthy 2022         | + | + | - | - | - | + | + | - |
| Umeda 2022            | + | ? | ? | ? | + | ? | + | - |
| Voerman 2022          | ? | + | ? | + | + | ? | + | ? |
| Bartho 2023           | + | + | + | ? | + | ? | + | ? |
| Chen 2023             | + | + | + | ? | ? | ? | + | ? |
| Elhakeem 2023         | + | + | - | ? | + | ? | + | + |
| Jafri 2023            | + | + | ? | ? | - | ? | - | - |
| Priante 2023          | + | + | + | + | + | ? | + | + |
| Tao 2023              | + | + | + | + | + | ? | ? | - |
| Troisi, 2023          | + | + | + | + | + | ? | ? | + |
| Yang 2023             | + | + | + | + | + | ? | + | - |
| Yeum 2023             | + | + | - | - | + | ? | + | + |
| Zhai 2023             | + | + | + | + | + | ? | + | ? |

 Low risk of bias
  Unclear risk of bias
  High risk of bias

**Supplementary Figure 2 | Pathway analysis for significantly and consistently up- and down-regulated metabolites (N=5) that were reported in more than one study in maternal plasma/serum at >20 weeks' gestation or in the peripartum period.** The metabolome view shows all matched pathways according to the p values from the pathway enrichment analysis and pathway impact values from the pathway topology analysis. Each circle in the figure represents a metabolic pathway. The colour of the circle indicates the significance level (Raw p) in the enrichment analysis; darker colour (redder) indicates greater significance. The size of the circle reflects the pathway impact value in the topology analysis, such that the larger the circle, the larger the impact value. There were no significantly enriched metabolic pathways (false discovery rate p value  $\geq 0.05$ ). FDR false discovery rate. Source data are provided as a Source Data file.

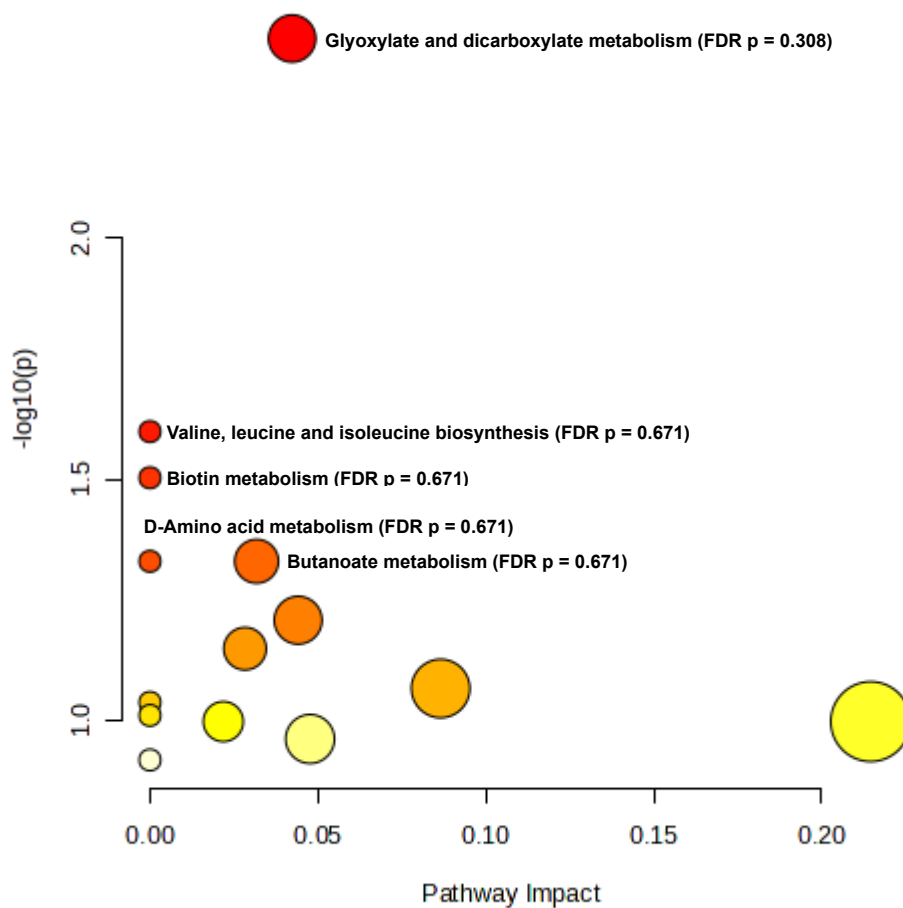

**Supplementary Figure 3 | Pathway analysis for significantly and consistently up- and down-regulated metabolites (N=3) that were reported in more than one study in placental samples.** The metabolome view shows all matched pathways according to the p values from the pathway enrichment analysis and pathway impact values from the pathway topology analysis. Each circle in the figure represents a metabolic pathway. The colour of the circle indicates the significance level (Raw p) in the enrichment analysis; darker colour (redder) indicates greater significance. The size of the circle reflects the pathway impact value in the topology analysis, such that the larger the circle, the larger the impact value. There were no significantly enriched metabolic pathways (false discovery rate p value  $\geq 0.05$ ). FDR false discovery rate. Source data are provided as a Source Data file.

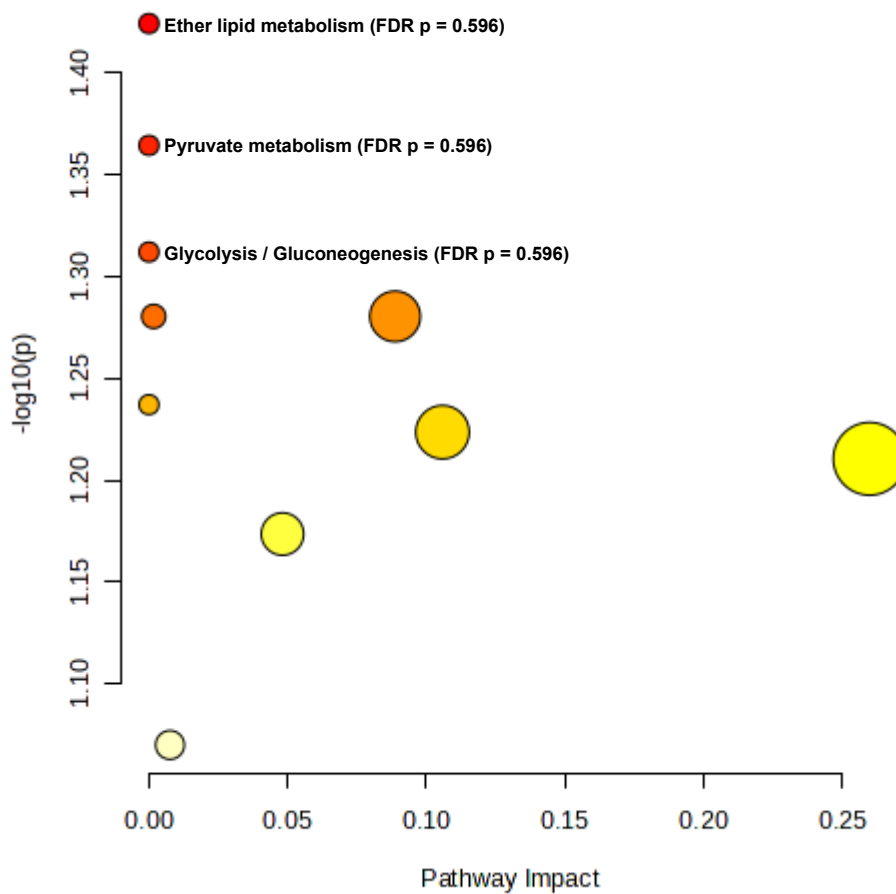

## Supplementary Box 1

**Metabolites significantly up-regulated or down-regulated in more than one study with a consistent direction of the association**

### **Maternal plasma or serum at $\leq 20$ weeks' gestation**

Pregnanediol-3-glucuronide

### **Maternal plasma or serum at $> 20$ weeks' gestation and in the peripartum period**

Isoleucine  
Lysine  
Serine  
4-aminobutyric acid  
Malic acid

### **Maternal hair**

Margaric acid  
Myristic acid

### **Placenta**

Glycine  
Glycerophosphocholine  
Lactic acid

### **Umbilical cord blood**

LysoPC (16:1)  
PC (36:3)  
Leucine  
Choline  
Triglyceride  
Glutamic acid  
Trans-4-hydroxyproline  
LysoPC (14:0)  
LysoPC (16:0)  
LysoPC (18:0)  
LysoPC (20:4)  
PC (36:1)  
PC (36:4)  
PC (38:4)  
PC (40:4)  
Decanoyl carnitine  
Dodecanoic acid  
2-aminoadipic acid  
Stearic acid  
Gamma-linolenic acid

Eicosatrienoic acid  
Arachidonic acid  
Cholesterol HDL  
Glucose

**Newborn dried blood spot**

Free carnitine  
Butyryl carnitine  
Acetyl carnitine  
Decenoyl carnitine  
Propionyl carnitine  
Proline  
Phenylalanine  
Leucine  
Glycine  
Tyrosine  
Valine  
Arginine  
Octadecadienyl carnitine  
Isovaleryl carnitine  
Tetradecanoyl carnitine  
Dodecanoyl carnitine  
Octadecanoyl carnitine  
Octadecenoyl carnitine

**Newborn urine**

Myo-inositol  
Creatinine  
Creatine
